# Supplementary material for: Tumor antigen specific iTreg accumulate in the tumor microenvironment and suppress therapeutic vaccination
Source: PubMed Central journal article supplement — Oncoimmunology. 2012 Aug 1;1(5):642–8. doi: 10.4161/onci.20298 (PMC3429568; doi:10.4161/onci.20298), 2012-08-01
Supplement: onci-1-642-s01.pdf [file onci-1-642-s01.pdf]

Supplementary Material to:

**Tumor Antigen Specific iTreg Accumulate in the Tumor Microenvironment and Suppress Therapeutic Vaccination**

Taylor H. Schreiber, Dietlinde Wolf, Maria Boderro, Eckhard R. Podack

Oncolmmunology 2012; 1(7): DOI: 10.4161.onco.20298

<http://www.landesbioscience.com/journals/oncoimmunology/article/20298>

| Primer Segment | Sequence (5' → 3')                       |
|----------------|------------------------------------------|
| <i>Vβ4</i>     | GCCTCAAGTCGCTTCCAACCTC                   |
| <i>Vβ7</i>     | TACAGGGTCTCACGGAAGAAGC                   |
| <i>Vβ8.2</i>   | CATTATTCATATGGTGCTGGC                    |
| <i>Vβ8.3</i>   | TGCTGGCAACCTTCGAATAGGA                   |
| <i>Vβ9</i>     | TCTCTCTACATTGGCTCTGCAGGC                 |
| <i>Vβ11</i>    | GCACTCAACTCTGAAGATCCAGAGC                |
| <i>Vβ12</i>    | GATGGTGGGGCTTTCAAGGATC                   |
| <i>Vβ14</i>    | ACGACCAATTCATCCTAAGCAC                   |
|                |                                          |
| <i>Cβ</i>      | CTTGGGTGGAGTCACATTTCT                    |
|                |                                          |
| <i>Jβ1.1</i>   | FAM- <del>ACT</del> GTGAGTCTGGTTCCTTTACC |

Supplemental Table 1: Primer sequences used for primary and secondary PCR reactions in TCR spectratyping analysis.

**A.**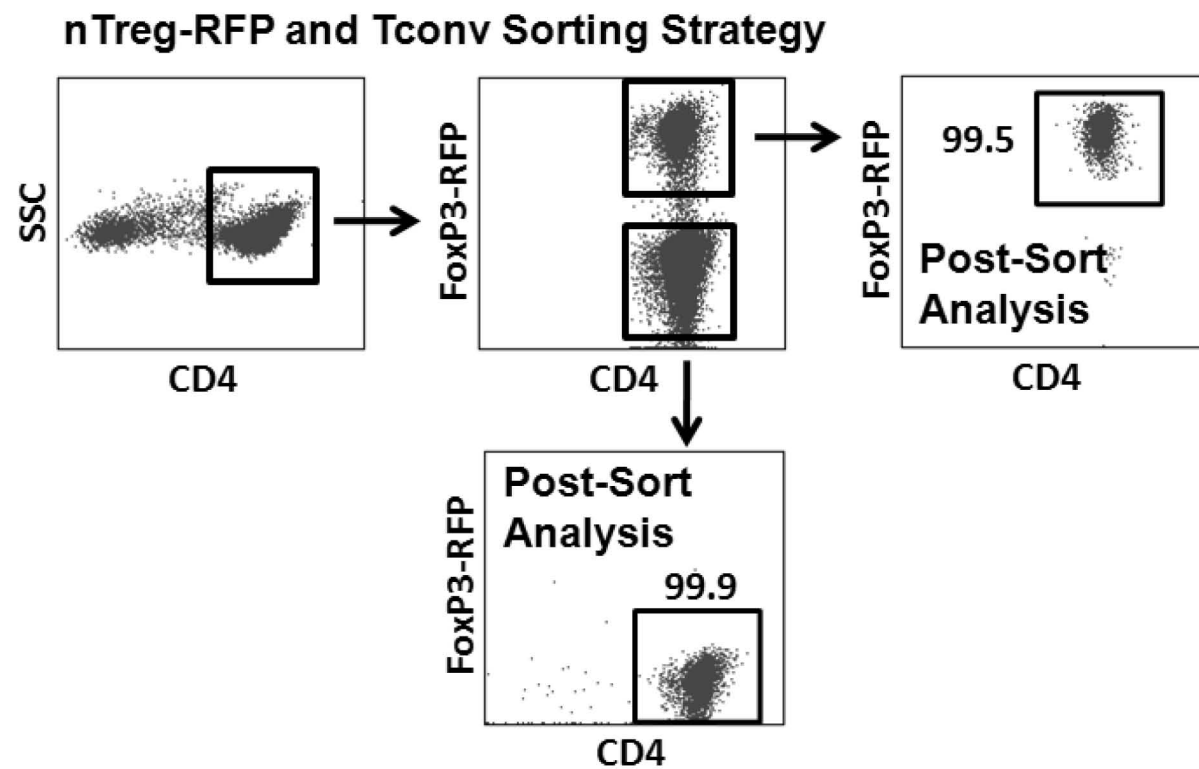**B.****Polyclonal iTreg and nTreg Analysis Plots**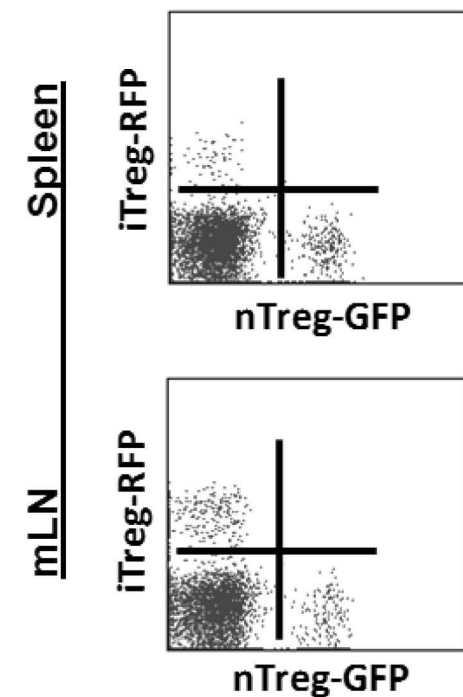**C.**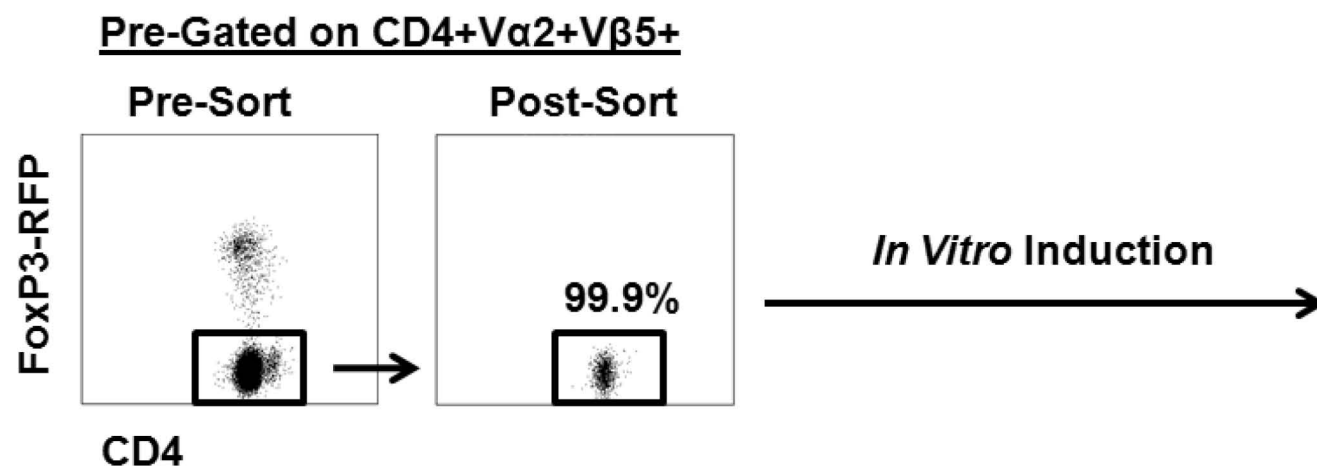**D.**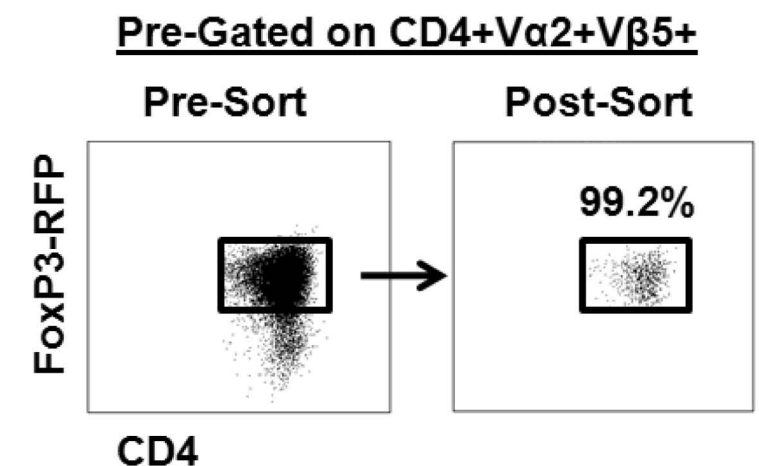

**Supplemental Figure 1: Sorting and detection strategies for iTreg and nTreg populations.** (A) Representative sorting strategy for purification of polyclonal Tconv (CD4+FoxP3-RFP negative) and nTreg (CD4+FoxP3-RFP positive) cells from FIR mice. (B) Representative analysis plots for detection of adoptively transferred polyclonal iTreg and nTreg in the mLN and spleen from CD4<sup>-/-</sup> mice as shown in Figure 1. (C) Example sorting profile for OT-II Tconv cells from OT-II/FIR mice. For some experiments the OT-II Tconv were used directly, and for some experiments these cells were subsequently used for *in vitro* induction to OT-II iTreg and re-sorted as shown in (D).
